# Supplementary material
Source: PubMed Central journal article supplement (PMC10018682)
Supplement: NIHMS1877659-supplement-PAINS-ZINC19373000_PDF_.pdf [file NIHMS1877659-supplement-PAINS-ZINC19373000_PDF_.pdf]

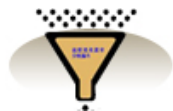

# False Positive Remover

Welcome *lius*

6890 Visitors Since 12-2009

[Edit User Profile](#)

[Sign Out](#)

[Main Page](#)>>Retrieve Structure

Return

Totally 23 Compound(s) passed the filter. [Download \(Smiles format\)](#) [view](#)  
 Totally 1 Compound(s) were filtered out by the filter. [Download \(Smiles format\)](#)  
 The following are the structure(s) of compound(s) that are filtered out by the filter

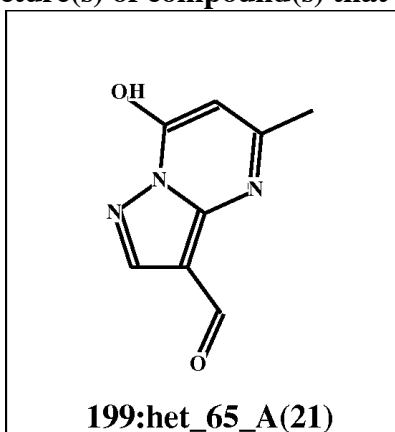

1 Compound(s) have the above features:

O=CC[1]=C[2]N=C(CH2)C=C(OH)N(@2)N=C@1

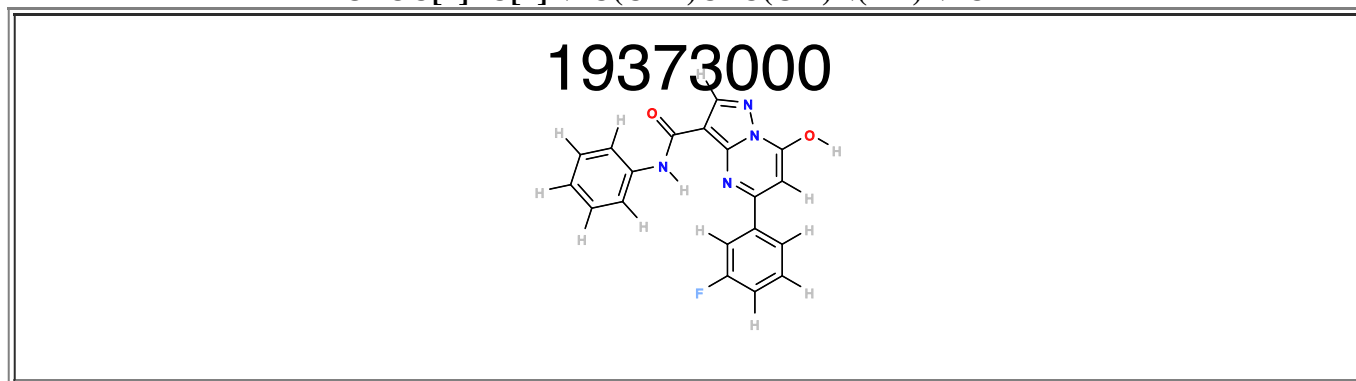

Return

1
