# Supplementary material
Source: PubMed Central journal article supplement (PMC10018682)
Supplement: NIHMS1877659-supplement-Supporting_Information__PDF_.pdf [file NIHMS1877659-supplement-Supporting_Information__PDF_.pdf]

## Supporting Information

### Identification of Small-Molecule Inhibitors of Fibroblast Growth Factor 23 Signaling via *In Silico* Hot Spot Prediction and Molecular Docking to $\alpha$ -Klotho

Shih-Hsien Liu<sup>1,2,#</sup>, Zhousheng Xiao<sup>3,#</sup>, Sambit K. Mishra<sup>4</sup>, Julie C. Mitchell<sup>4</sup>, Jeremy C. Smith<sup>1,2</sup>, L. Darryl Quarles<sup>3</sup>, Loukas Petridis<sup>1,2\*</sup>

<sup>1</sup> UT/ORNL Center for Molecular Biophysics, Oak Ridge National Laboratory, Oak Ridge, Tennessee 37831, United States

<sup>2</sup> Department of Biochemistry and Cellular and Molecular Biology, University of Tennessee, Knoxville, Tennessee 37996, United States

<sup>3</sup> Department of Medicine, College of Medicine, University of Tennessee Health Science Center, Memphis, Tennessee 38163, United States

<sup>4</sup> Biosciences Division, Oak Ridge National Laboratory, Oak Ridge, Tennessee 37831, United States

#Equal contribution

\*Corresponding author:

**Email:** petridisl@ornl.gov

**Phone:** +1-865-576-2576

## S1. MD Simulations of $\alpha$ -Klotho

We used the steepest descent algorithm for energy minimization, which was considered converged when the maximum force  $< 1000$  kJ/mol/nm. We used the v-rescale thermostat<sup>1</sup> with 0.2 ps as the time constant for coupling with two temperature coupling groups each for  $\alpha$ -Klotho and water. We used the Berendsen<sup>2</sup> and Parrinello-Rahman<sup>3</sup> barostats with 2 ps as the time constant for coupling for equilibration and production, respectively. The isothermal compressibility for pressure coupling was  $0.000044$  bar<sup>-1</sup>.<sup>4</sup> We used Verlet cutoff-scheme, fast smooth particle mesh Ewald (PME)<sup>5</sup> electrostatics, and linear constraint solver (LINCS)<sup>6</sup> algorithm on hydrogen-containing bonds.

To find the time period in production where structures of  $\alpha$ -Klotho were equilibrated for clustering, three properties of  $\alpha$ -Klotho were examined as a function of simulation time: 1) root-mean-square deviation (RMSD) of backbone atoms with respect to the crystal structure<sup>7</sup> (Figure S1), 2) radius of gyration,  $R_g$  (Figure S2), and 3) non-bonded potential energies ( $E_{\text{pot}}$ ) of all atoms (Figure S3). Figures S1-S3 show that structures of  $\alpha$ -Klotho in the last 100 ns for each of the five instances are well equilibrated.

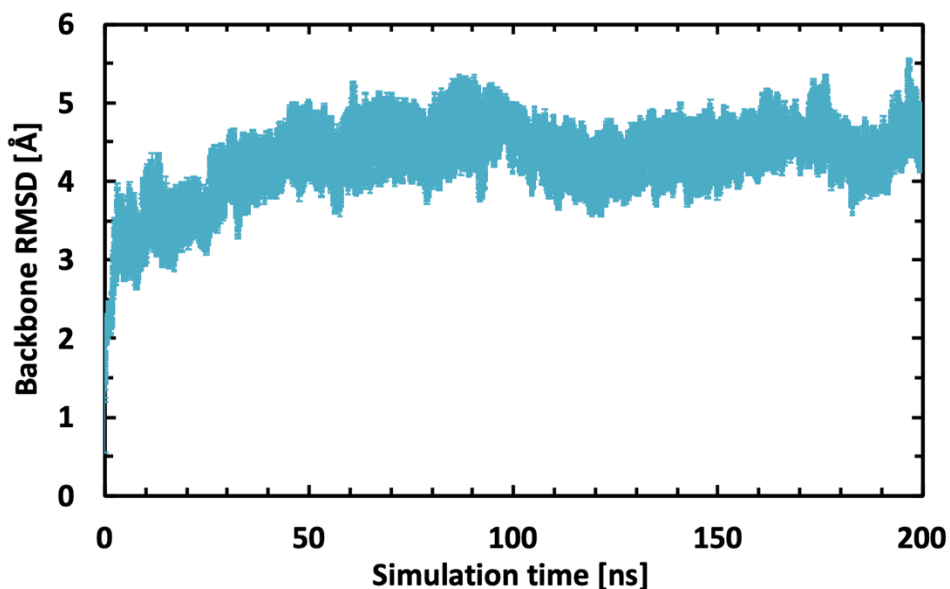

**Figure S1.** RMSD of backbone atoms on  $\alpha$ -Klotho from crystal structure<sup>7</sup> vs. simulation time with error bars among the five instances. The average over the last 100 ns is  $4.41 \pm 0.00$  Å.

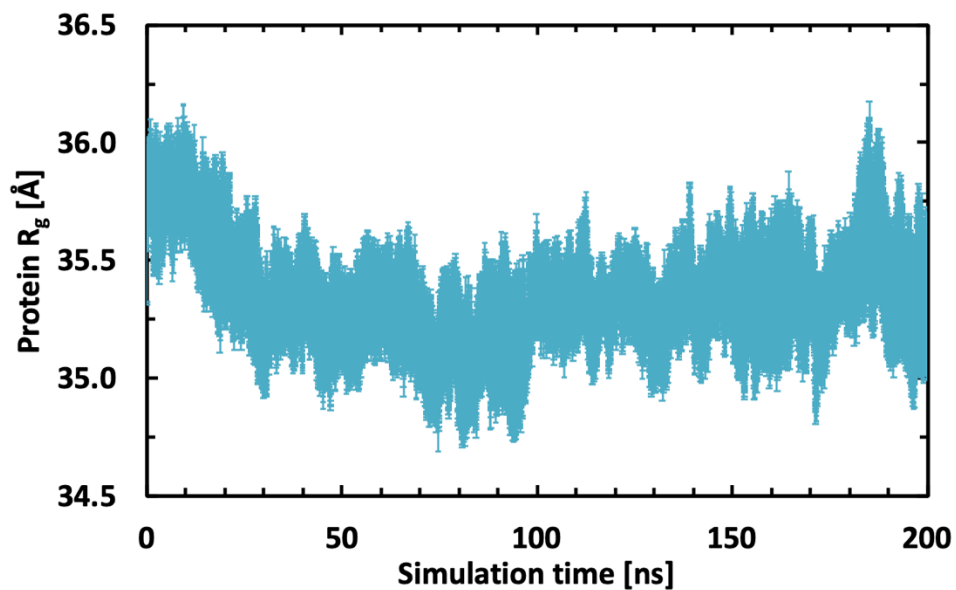

**Figure S2.**  $R_g$  of amino acid residues on  $\alpha$ -Klotho vs. simulation time with error bars among the five instances. The average over the last 100 ns is  $35.36 \pm 0.00 \text{ \AA}$ .

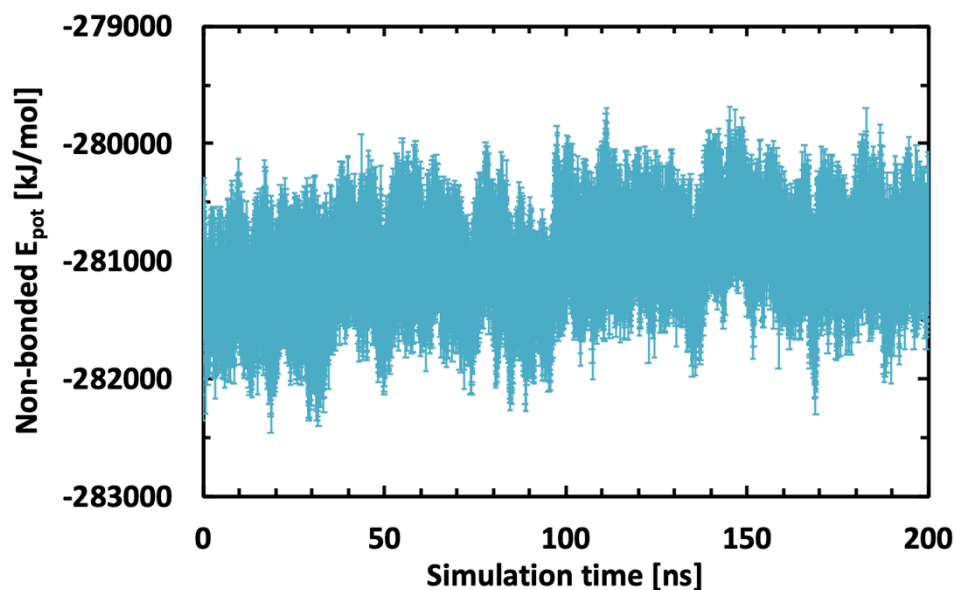

**Figure S3.** Non-bonded  $E_{\text{pot}}$  of all atoms on  $\alpha$ -Klotho vs. simulation time with error bars among the five instances. The average over the last 100 ns is  $-280874 \pm 2 \text{ kJ/mol}$ .

## S2. Clustering of $\alpha$ -Klotho

**Table S1.** Test of RMSD cutoff on interface residues. For each tested cutoff, the number of total and 1-frame clusters and the percentage of MD frames for clusters #1-10 are shown. The RMSD cutoff chosen and its results are shown in red.

| <b>RMSD cutoff<br/>[Å]</b>               | <b>1.50</b> | <b>1.51</b> | <b>1.52</b> | <b>1.53</b> | <b>1.54</b> | <b>1.55</b> | <b>1.6</b> | <b>1.7</b> | <b>1.8</b> | <b>1.9</b> | <b>2.0</b> |       |
|------------------------------------------|-------------|-------------|-------------|-------------|-------------|-------------|------------|------------|------------|------------|------------|-------|
| <b># total<br/>clusters</b>              | 44          | 41          | 38          | 37          | 35          | 34          | 29         | 16         | 11         | 7          | 6          |       |
| <b># 1-frame<br/>clusters</b>            | 3           | 3           | 1           | 2           | 2           | 3           | 2          | 2          | 1          | 1          | 2          |       |
| <b>frame<br/>% for<br/>cluster<br/>#</b> | <b>1</b>    | 75.7        | 77.1        | 78.4        | 79.7        | 81.2        | 82.6       | 88.1       | 94.8       | 97.9       | 99.2       | 99.7  |
|                                          | <b>2</b>    | 7.7         | 7.5         | 7.2         | 8.0         | 7.5         | 6.9        | 5.0        | 2.2        | 1.1        | 0.5        | 0.2   |
|                                          | <b>3</b>    | 3.9         | 3.7         | 3.5         | 3.4         | 3.3         | 3.1        | 2.2        | 1.2        | 0.5        | 0.1        | 0.0   |
|                                          | <b>4</b>    | 3.8         | 3.5         | 2.3         | 2.0         | 1.8         | 1.7        | 1.2        | 0.7        | 0.2        | 0.1        | 0.0   |
|                                          | <b>5</b>    | 2.1         | 2.1         | 2.0         | 1.6         | 1.6         | 1.5        | 1.1        | 0.4        | 0.2        | 0.0        | 0.0   |
|                                          | <b>6</b>    | 1.5         | 1.3         | 1.9         | 1.2         | 1.1         | 1.1        | 0.8        | 0.2        | 0.1        | 0.0        | 0.0   |
|                                          | <b>7</b>    | 1.2         | 1.1         | 1.5         | 1.0         | 0.9         | 0.8        | 0.5        | 0.2        | 0.0        | 0.0        |       |
|                                          | <b>8</b>    | 0.8         | 0.7         | 0.6         | 0.9         | 0.8         | 0.7        | 0.3        | 0.1        | 0.0        |            |       |
|                                          | <b>9</b>    | 0.7         | 0.7         | 0.5         | 0.4         | 0.4         | 0.3        | 0.2        | 0.1        | 0.0        |            |       |
|                                          | <b>10</b>   | 0.6         | 0.5         | 0.5         | 0.4         | 0.4         | 0.3        | 0.1        | 0.0        | 0.0        |            |       |
|                                          | <b>sum</b>  | 98.1        | 98.3        | 98.4        | 98.7        | 98.9        | 99.0       | 99.5       | 99.9       | 100.0      | 100.0      | 100.0 |

### S3. Coordination of the Zn Atom on All $\alpha$ -Klotho Structures in the Ensemble Docking

**Table S2.** The distances in Å between the Zn atoms and C $\alpha$  atoms of Asp426, Cys739, Asp745, and Asp815 (the 4 residues with which the Zn atom coordinates in the crystal structure) for the crystal structure<sup>7</sup> and 10 MD clusters of  $\alpha$ -Klotho.

| receptor<br>residue | crystal | cluster # |     |     |     |     |     |     |     |     |     |
|---------------------|---------|-----------|-----|-----|-----|-----|-----|-----|-----|-----|-----|
|                     |         | 1         | 2   | 3   | 4   | 5   | 6   | 7   | 8   | 9   | 10  |
| <b>Asp426</b>       | 5.0     | 5.6       | 5.4 | 5.6 | 5.5 | 5.6 | 4.7 | 5.0 | 4.9 | 5.6 | 5.6 |
| <b>Cys739</b>       | 4.2     | 5.3       | 5.0 | 5.2 | 5.4 | 5.0 | 5.0 | 5.6 | 5.0 | 5.2 | 5.2 |
| <b>Asp745</b>       | 5.4     | 5.4       | 5.3 | 5.5 | 5.0 | 4.9 | 4.9 | 4.8 | 4.9 | 5.5 | 5.2 |
| <b>Asp815</b>       | 4.5     | 4.6       | 4.5 | 4.5 | 4.5 | 4.4 | 4.2 | 4.7 | 4.6 | 4.6 | 4.6 |

## S4. Docking to $\alpha$ -Klotho

**Table S3.** The Cartesian coordinates of centers of ligand pose-searching boxes for the crystal structure<sup>7</sup> and 10 MD clusters of  $\alpha$ -Klotho.

|          |           | box center |        |        |
|----------|-----------|------------|--------|--------|
|          |           | x          | y      | z      |
| receptor | crystal   | 146.44     | 132.49 | 57.13  |
|          | cluster # | <b>1</b>   | 146.21 | 133.13 |
|          | <b>2</b>  | 145.99     | 132.92 | 56.68  |
|          | <b>3</b>  | 145.69     | 133.78 | 56.47  |
|          | <b>4</b>  | 146.37     | 132.79 | 56.91  |
|          | <b>5</b>  | 146.68     | 132.97 | 56.47  |
|          | <b>6</b>  | 146.67     | 132.44 | 56.96  |
|          | <b>7</b>  | 146.56     | 132.94 | 56.56  |
|          | <b>8</b>  | 146.87     | 132.84 | 56.74  |
|          | <b>9</b>  | 146.95     | 133.22 | 56.41  |
|          | <b>10</b> | 145.63     | 134.20 | 56.36  |

**Table S4.** The distances in Å between centers of ligand pose-searching boxes and C $\alpha$  atoms of interface residues for the crystal structure<sup>7</sup> and 10 MD clusters of  $\alpha$ -Klotho. Values in red indicate that C $\alpha$  atoms are located outside of boxes. We note that Ser471 and Gln844 are not computationally predicted hot spots at the KL1:KL2:FGF23 interface of  $\alpha$ -Klotho (See Table 1 in the main text).

| receptor<br>residue | crystal | cluster # |      |      |      |      |      |      |      |      |      |
|---------------------|---------|-----------|------|------|------|------|------|------|------|------|------|
|                     |         | 1         | 2    | 3    | 4    | 5    | 6    | 7    | 8    | 9    | 10   |
| Lys429              | 5.9     | 5.0       | 5.4  | 5.1  | 5.4  | 5.3  | 5.2  | 5.4  | 5.5  | 5.0  | 5.0  |
| Tyr433              | 6.1     | 6.2       | 6.1  | 6.1  | 6.1  | 6.2  | 6.1  | 6.1  | 6.0  | 6.1  | 6.0  |
| Phe437              | 10.5    | 10.9      | 11.2 | 11.0 | 11.0 | 10.8 | 11.1 | 10.9 | 10.7 | 11.1 | 11.3 |
| Ser471              | 21.3    | 21.6      | 22.0 | 21.5 | 21.7 | 20.9 | 21.8 | 21.1 | 22.5 | 20.3 | 20.5 |
| Lys823              | 16.4    | 15.8      | 15.8 | 16.3 | 18.1 | 17.2 | 15.7 | 16.5 | 16.0 | 17.4 | 16.7 |
| Met833              | 8.3     | 9.2       | 9.1  | 8.5  | 8.8  | 9.7  | 8.6  | 9.4  | 9.2  | 10.7 | 8.8  |
| Thr834              | 7.3     | 7.3       | 7.5  | 7.5  | 7.1  | 8.4  | 7.4  | 7.8  | 7.7  | 8.3  | 7.5  |
| Ile836              | 7.2     | 6.5       | 6.5  | 7.0  | 6.7  | 8.0  | 6.8  | 7.0  | 6.9  | 8.2  | 6.4  |
| Gln844              | 16.2    | 16.8      | 16.9 | 16.9 | 16.5 | 16.7 | 17.8 | 16.7 | 18.4 | 17.2 | 16.3 |

## S5. Hot Spot Analysis on the FGF23:FGFR1c: $\alpha$ -Klotho Ternary Complex

**Table S5.** The 9 residues defining the D3:FGF23 interface in the ternary crystal structure,<sup>7</sup> and additional 2 residues in bold were predicted as druggable sites using FTMap.<sup>8</sup> The hot-spot identification and confidence scores were evaluated by the KFC2a method.<sup>9</sup> Positive confidence scores suggest prospective hot spots, and 4 out of 9 interface residues are predicted hot spots. N/A: not available.

| <b>Protein</b>                | <b>Residue</b> | <b>Number</b> | <b>Hot spot</b> | <b>Confidence score</b> |
|-------------------------------|----------------|---------------|-----------------|-------------------------|
| FGFR1c<br>D3 domain           | Arg            | 250           | Yes             | 0.49                    |
|                               | <b>Tyr</b>     | <b>280</b>    | <b>No</b>       | <b>-1.95</b>            |
|                               | <b>Ser</b>     | <b>281</b>    | <b>N/A</b>      | <b>N/A</b>              |
|                               | Asp            | 282           | No              | -2.25                   |
|                               | Pro            | 283           | Yes             | 0.19                    |
| FGF23<br>N-terminal<br>domain | His            | 117           | Yes             | 0.24                    |
|                               | Thr            | 119           | No              | -0.99                   |
|                               | Gly            | 123           | No              | -1.21                   |
|                               | Asp            | 125           | Yes             | 0.11                    |
|                               | Tyr            | 127           | N/A             | N/A                     |
|                               | Ser            | 159           | No              | -0.58                   |

**Table S6.** The 4 residues defining the KL2:FGF23 interface in the ternary crystal structure.<sup>7</sup> The hot-spot identification and confidence scores were evaluated by the KFC2a method.<sup>9</sup> Positive confidence scores suggest prospective hot spots, and 3 out of 4 interface residues are predicted hot spots.

| <b>Protein</b>                 | <b>Residue</b> | <b>Number</b> | <b>Hot spot</b> | <b>Confidence score</b> |
|--------------------------------|----------------|---------------|-----------------|-------------------------|
| $\alpha$ -Klotho<br>KL2 domain | Asp            | 756           | No              | -0.38                   |
| FGF23<br>C-terminal tail       | Lys            | 194           | Yes             | 0.71                    |
|                                | Arg            | 196           | Yes             | 1.76                    |
|                                | Arg            | 198           | Yes             | 1.48                    |

**Table S7.** The 11 residues defining the D2:FGF23 interface in the ternary crystal structure.<sup>7</sup> The hot-spot identification and confidence scores were evaluated by the KFC2a method.<sup>9</sup> Positive confidence scores suggest prospective hot spots, and 7 out of 11 interface residues are predicted hot spots.

| <b>Protein</b>                | <b>Residue</b> | <b>Number</b> | <b>Hot spot</b> | <b>Confidence score</b> |
|-------------------------------|----------------|---------------|-----------------|-------------------------|
| FGFR1c<br>D2 domain           | Glu            | 162           | No              | -1.39                   |
|                               | Leu            | 165           | Yes             | 1.23                    |
|                               | Ala            | 167           | Yes             | 1.32                    |
|                               | Gln            | 244           | No              | -1.10                   |
|                               | Val            | 248           | Yes             | 0.94                    |
| FGF23<br>N-terminal<br>domain | Tyr            | 43            | Yes             | 1.19                    |
|                               | Asn            | 49            | Yes             | 0.03                    |
|                               | Ser            | 50            | Yes             | 0.06                    |
|                               | His            | 66            | No              | -0.74                   |
|                               | Tyr            | 124           | No              | -0.29                   |
|                               | Leu            | 158           | Yes             | 1.34                    |



**Table S8.** The 20 residues defining the RBA:D3 interface in the ternary crystal structure.<sup>7</sup> The hot-spot identification and confidence scores were evaluated by the KFC2a method.<sup>9</sup> Positive confidence scores suggest prospective hot spots, and 10 out of 20 interface residues are predicted hot spots. N/A: not available.

| <b>Protein</b>          | <b>Residue</b> | <b>Number</b> | <b>Hot spot</b> | <b>Confidence score</b> |
|-------------------------|----------------|---------------|-----------------|-------------------------|
| $\alpha$ -Klotho<br>RBA | Val            | 546           | Yes             | 0.54                    |
|                         | Tyr            | 547           | Yes             | 0.42                    |
|                         | Leu            | 548           | Yes             | 1.19                    |
|                         | Trp            | 549           | Yes             | 1.66                    |
|                         | Lys            | 555           | Yes             | 0.33                    |
|                         | Arg            | 556           | No              | -2.71                   |
|                         | Leu            | 557           | Yes             | 1.01                    |
|                         | Ile            | 558           | No              | -1.81                   |
|                         | Val            | 560           | No              | -1.81                   |
|                         | Val            | 563           | N/A             | N/A                     |
| FGFR1c<br>D3 domain     | Val            | 564           | No              | -1.68                   |
|                         | Leu            | 290           | Yes             | 1.37                    |
|                         | Ile            | 293           | No              | -0.07                   |
|                         | Val            | 295           | No              | -0.69                   |
|                         | Leu            | 305           | Yes             | 0.41                    |
|                         | Tyr            | 307           | No              | -0.91                   |
|                         | Val            | 308           | Yes             | 1.04                    |
|                         | Ile            | 310           | Yes             | 0.81                    |
|                         | Leu            | 342           | No              | -0.56                   |
|                         | Leu            | 349           | No              | -1.89                   |

## S6. Surface Pocket Analysis on $\alpha$ -Klotho in the Ternary Complex

**Table S9.** The residues participating in the surface pockets (See Figure 2 in the main text) in  $\alpha$ -Klotho crystal structure<sup>7</sup> using CASTp.<sup>10</sup>

| <b>Pocket 1</b> |               | <b>Pocket 2</b> |               |
|-----------------|---------------|-----------------|---------------|
| <b>Residue</b>  | <b>Number</b> | <b>Residue</b>  | <b>Number</b> |
| Trp             | 42            | Pro             | 51            |
| Arg             | 44            | Glu             | 52            |
| Phe             | 45            | Gly             | 55            |
| Ser             | 46            | Leu             | 56            |
| Arg             | 47            | Phe             | 57            |
| Pro             | 48            | Arg             | 425           |
| Pro             | 49            | Met             | 431           |
| Ala             | 50            | Tyr             | 432           |
| Pro             | 51            | Lys             | 435           |
| Ala             | 53            | Met             | 439           |
| Ala             | 54            | Pro             | 490           |
| Asn             | 304           | Lys             | 491           |
| Pro             | 305           | Ser             | 492           |
| Arg             | 306           | Leu             | 495           |
| Met             | 308           | Phe             | 496           |
| Leu             | 389           | Lys             | 499           |
| Glu             | 390           | Leu             | 500           |
| Ser             | 391           | Lys             | 503           |
| Pro             | 392           | Gly             | 505           |
| Asn             | 393           | Phe             | 506           |
| Leu             | 394           | Pro             | 507           |
| Arg             | 395           | Leu             | 509           |
| Gln             | 396           | Glu             | 511           |
| Lys             | 429           | Asn             | 512           |
| Tyr             | 432           | Gln             | 513           |
| Tyr             | 433           | Pro             | 514           |
| Lys             | 436           | Glu             | 736           |
| Phe             | 437           | Pro             | 737           |
| Glu             | 440           | Ala             | 738           |
| Lys             | 443           | Cys             | 739           |
| Leu             | 447           | Pro             | 740           |
| Asp             | 448           | Phe             | 741           |
| Glu             | 819           | Ser             | 742           |
| Asp             | 820           | Leu             | 813           |
| Lys             | 823           | Asp             | 835           |

|     |     |     |     |
|-----|-----|-----|-----|
| Gln | 831 | Thr | 837 |
| Glu | 832 | Trp | 838 |
| Met | 833 | Leu | 839 |
| Thr | 834 | Val | 847 |
| Asp | 835 | Val | 848 |
| Ile | 836 | Pro | 849 |
| Thr | 837 | Trp | 850 |
| Trp | 838 | Arg | 853 |
| Leu | 839 | Lys | 854 |
| Asn | 840 | Tyr | 889 |
| Ser | 841 | Gln | 892 |
| Pro | 842 | Asn | 893 |
| Gln | 844 | Asn | 896 |
| Gly | 878 | Glu | 897 |
| Leu | 879 | Lys | 900 |
| Glu | 882 | Leu | 904 |
| Gln | 885 |     |     |
| Leu | 886 |     |     |

---

## S7. Contact Analysis on the 45 Compounds

**Table S10.** The average non-hydrogen atomic contacts ( $\overline{\text{Contact}}$ ) with stand errors of ligands listed in Tables 2 and 3 and shown in Figure 4 in the main text with residues in surface pockets in  $\alpha$ -Klotho structures. The numbers of contacts are rounded to the nearest integer, and only residues with  $\overline{\text{Contact}} > 1$  are listed.

| Ligands in Table 2<br>(orange ones in Figure 4) |                             |                   |                             |                   |         | Ligands in Table 3<br>(red ones in Figure 4) |                             |
|-------------------------------------------------|-----------------------------|-------------------|-----------------------------|-------------------|---------|----------------------------------------------|-----------------------------|
| crystal                                         |                             | cluster #8        |                             | cluster #2        |         | crystal                                      |                             |
| Residue<br>Number                               | $\overline{\text{Contact}}$ | Residue<br>Number | $\overline{\text{Contact}}$ | Residue<br>Number | Contact | Residue<br>Number                            | $\overline{\text{Contact}}$ |
| Trp850                                          | 17 ± 2                      | Leu56             | 25 ± 1                      | Phe57             | 17      | Tyr433                                       | 23 ± 0                      |
| Phe57                                           | 14 ± 1                      | Trp850            | 8 ± 0                       | Trp838            | 9       | Lys436                                       | 10 ± 1                      |
| Trp838                                          | 11 ± 1                      | Leu839            | 8 ± 2                       | Lys435            | 8       | Ile836                                       | 9 ± 0                       |
| Asn512                                          | 6 ± 1                       | Gly55             | 7 ± 1                       | Phe506            | 6       | Pro392                                       | 7 ± 0                       |
| Lys435                                          | 4 ± 0                       | Asn512            | 6 ± 0                       | Trp850            | 5       | Lys429                                       | 6 ± 1                       |
| Pro849                                          | 2 ± 0                       | Trp838            | 5 ± 1                       | Leu839            | 4       | Phe437                                       | 4 ± 0                       |
| Thr837                                          | 2 ± 0                       | Glu52             | 3 ± 2                       | Thr837            | 4       | Asn393                                       | 3 ± 1                       |
| Phe506                                          | 2 ± 1                       | Phe57             | 3 ± 0                       | Leu56             | 3       | Tyr432                                       | 2 ± 0                       |
| Asp835                                          | 2 ± 1                       | Pro849            | 2 ± 0                       | Tyr889            | 3       | Met833                                       | 2 ± 0                       |
|                                                 |                             | Thr837            | 2 ± 1                       | Val847            | 3       |                                              |                             |
|                                                 |                             | Ala53             | 2 ± 1                       |                   |         |                                              |                             |

## S8. Surface Pocket Analysis on $\alpha$ -Klotho MD Clusters

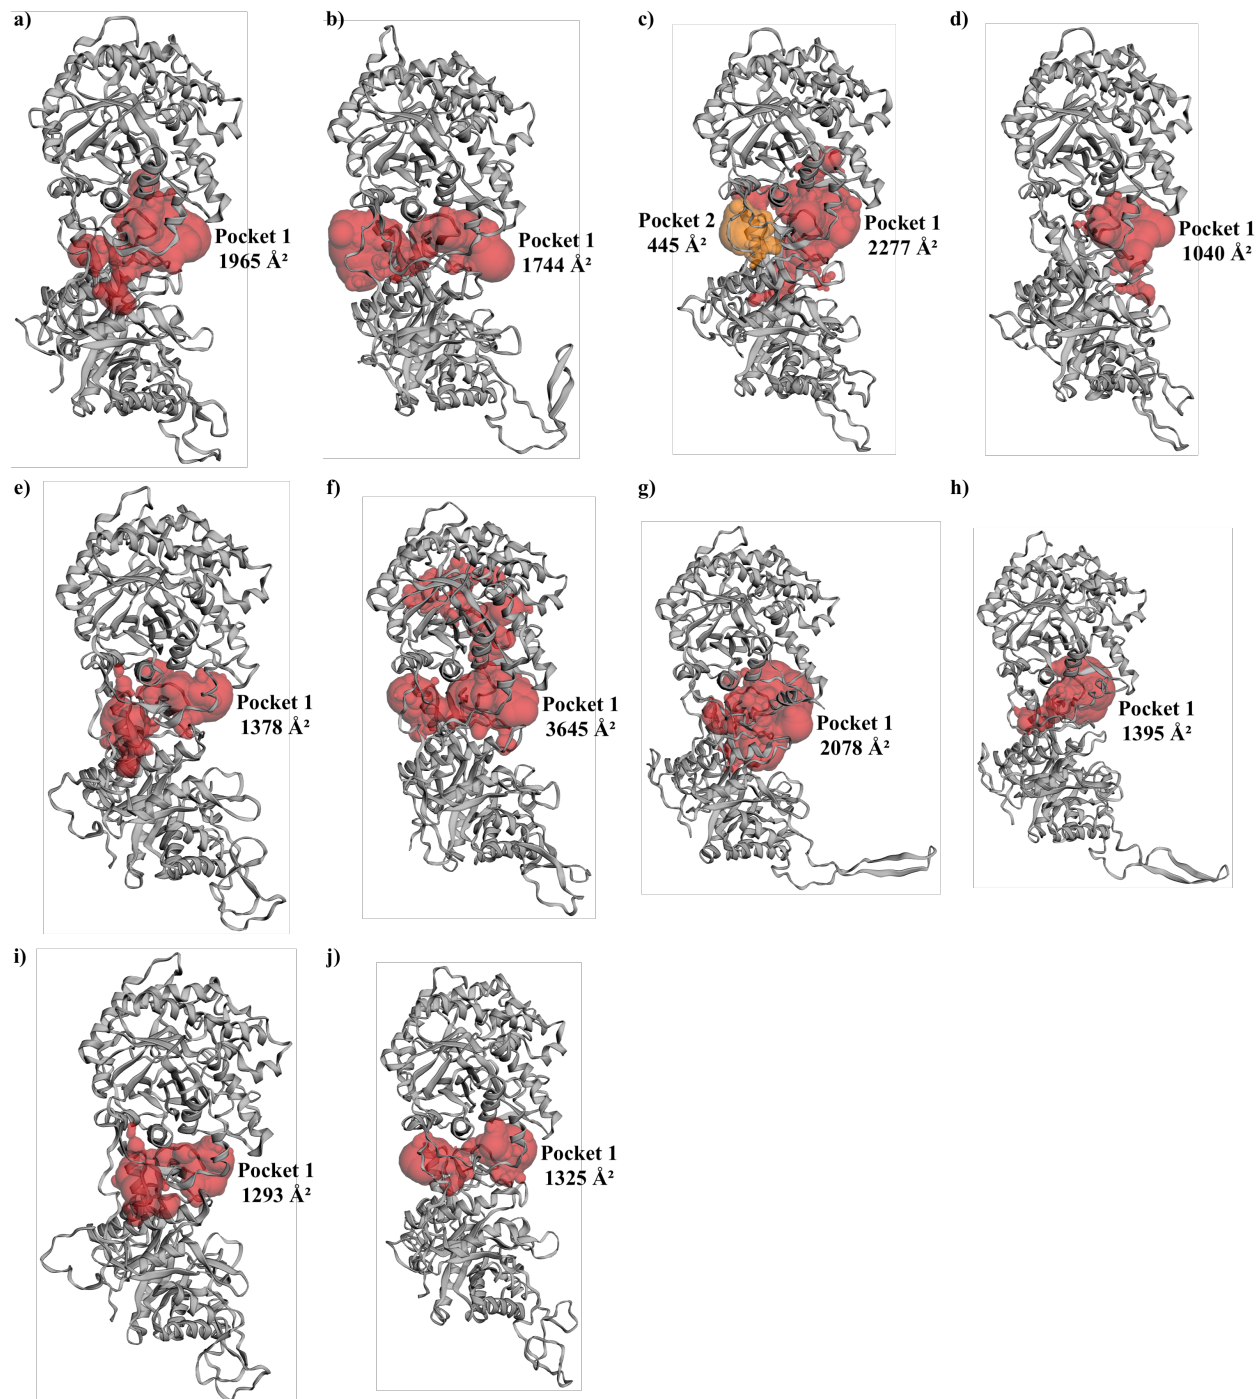

**Figure S4.** The surface Pockets 1 (red) and 2 (orange), which derive from Figure 2 in the main text, with their SASA in  $\text{\AA}^2$  calculated using CASTp<sup>10</sup> for  $\alpha$ -Klotho MD clusters #1-10 (a-j). The residues participating in these pockets are listed in Table S11.

**Table S11.** The residues participating in surface Pockets 1 and 2 (See Figure S4) in  $\alpha$ -Klotho MD clusters #1-10 using CASTp.<sup>10</sup>

| #1     | #2     | #3              | #4     | #5     | #6     | #7     | #8     | #9     | #10    |
|--------|--------|-----------------|--------|--------|--------|--------|--------|--------|--------|
| Asp37  | Thr41  | <b>Pocket 1</b> | Gln40  | Trp42  | Gln40  | Thr41  | Phe45  | Thr41  | Thr41  |
| Gly38  | Arg44  | Thr41           | Thr41  | Phe45  | Thr41  | Ala43  | Ser46  | Trp42  | Arg44  |
| Gln40  | Phe45  | Trp42           | Arg44  | Ser46  | Arg44  | Arg44  | Arg47  | Phe45  | Phe45  |
| Thr41  | Ser46  | Arg44           | Phe45  | Pro48  | Phe45  | Phe45  | Pro48  | Ser46  | Arg47  |
| Arg44  | Arg47  | Phe45           | Ser46  | Pro49  | Ser46  | Ser46  | Pro49  | Arg47  | Pro48  |
| Phe45  | Pro48  | Ser46           | Arg47  | Ala50  | Arg47  | Arg47  | Ala50  | Pro48  | Pro49  |
| Ser46  | Pro49  | Arg47           | Pro48  | Pro51  | Pro48  | Pro48  | Pro51  | Pro49  | Ala50  |
| Arg47  | Ala50  | Pro48           | Pro49  | Glu52  | Pro49  | Pro49  | Glu52  | Pro51  | Pro51  |
| Pro48  | Pro51  | Pro49           | Ala50  | Glu52  | Ala50  | Ala50  | Ala53  | Glu52  | Glu52  |
| Pro49  | Glu52  | Ala50           | Ala53  | Ala53  | Pro51  | Pro51  | Ala54  | Ala53  | Ala53  |
| Ala50  | Ala53  | Pro51           | Ala54  | Ala54  | Glu52  | Glu52  | Gly55  | Ala54  | Ala54  |
| Pro51  | Ala54  | Ala53           | Gly55  | Gly55  | Ala53  | Ala53  | Leu56  | Gly55  | Gly55  |
| Glu52  | Gly55  | Ala54           | Leu56  | Leu56  | Ala54  | Gly55  | Phe57  | Leu56  | Leu56  |
| Ala53  | Leu56  | Gly55           | Phe57  | Phe57  | Gly55  | Leu56  | Gln58  | Phe57  | Phe57  |
| Ala54  | Phe57  | Ser300          | Asn304 | Gln58  | Leu56  | Phe57  | Asn304 | Gln58  | Gln58  |
| Gly55  | Gln58  | Trp302          | Pro305 | Phe61  | Phe57  | Gln58  | Phe371 | Phe61  | Asn304 |
| Leu56  | Asn304 | Ile303          | Arg306 | Trp67  | Gln58  | Asn304 | Gly372 | Trp67  | Pro305 |
| Phe57  | Pro305 | Asn304          | Arg307 | Trp302 | Ser71  | Pro305 | Pro373 | Trp302 | Met308 |
| Gln58  | Arg306 | Pro305          | Met308 | Asn304 | Ala72  | Arg306 | Phe377 | Asn304 | Leu389 |
| Asn304 | Arg307 | Arg306          | Leu389 | Pro305 | Ala73  | Arg307 | Gln378 | Pro305 | Glu390 |
| Pro305 | Met308 | Met308          | Glu390 | Arg306 | Tyr74  | Phe377 | Leu389 | Met308 | Ser391 |
| Arg306 | Leu389 | Ile313          | Ser391 | Met308 | Gln75  | Gln378 | Glu390 | Leu389 | Pro392 |
| Arg307 | Ser391 | Ser319          | Pro392 | Leu389 | Thr76  | Lys385 | Ser391 | Glu390 | Asn393 |
| Met308 | Pro392 | Leu320          | Asn393 | Glu390 | Glu77  | Arg387 | Pro392 | Ser391 | Arg395 |
| Pro373 | Asn393 | Val323          | Arg395 | Ser391 | Gly78  | Gln388 | Asn393 | Pro392 | Gln396 |
| Ser376 | Arg395 | Phe371          | Gln396 | Pro392 | Gly79  | Leu389 | Arg395 | Asn393 | Ser399 |
| Phe377 | Gln396 | Gly372          | Ser399 | Asn393 | Trp80  | Glu390 | Gln396 | Arg395 | Met431 |
| Leu389 | Ser399 | Pro373          | Leu403 | Arg395 | Gln82  | Ser391 | Trp417 | Gln396 | Tyr432 |
| Glu390 | Met431 | Leu375          | Lys436 | Gln396 | Lys85  | Pro392 | Phe418 | Lys429 | Lys435 |
| Ser391 | Tyr432 | Ser376          | Met439 | Val419 | Gly86  | Asn393 | Val419 | Met431 | Lys436 |
| Pro392 | Tyr433 | Phe377          | Glu440 | Ser420 | Asp91  | Arg395 | Ser420 | Tyr432 | Met439 |
| Asn393 | Lys435 | Leu380          | Lys443 | Thr422 | Thr92  | Gln396 | Thr422 | Tyr433 | Glu440 |
| Arg395 | Lys436 | Lys385          | Leu447 | Thr423 | Phe93  | Trp417 | Thr423 | Lys435 | Lys443 |
| Gln396 | Met439 | Gln388          | Asp448 | Lys424 | Thr94  | Phe418 | Asp426 | Lys436 | Leu447 |
| Ser399 | Glu440 | Leu389          | Asp835 | Asp426 | Pro97  | Val419 | Asp427 | Ile438 | Asp448 |
| Trp400 | Lys443 | Glu390          | Ile836 | Asp427 | Gln118 | Ser420 | Ala428 | Met439 | Leu495 |
| Leu403 | Asp448 | Ser391          | Thr837 | Ala428 | Pro119 | Thr423 | Lys429 | Glu440 | Phe496 |
| Trp417 | Leu495 | Pro392          | Trp838 | Lys429 | Ala120 | Asp426 | Tyr430 | Lys443 | Lys499 |
| Phe418 | Phe496 | Asn393          | Leu839 | Tyr432 | Thr121 | Asp427 | Tyr432 | Phe496 | Leu500 |
| Val419 | Lys499 | Arg395          | Asn840 | Tyr433 | Ala125 | Ala428 | Tyr433 | Leu500 | Lys503 |

|        |        |        |        |        |        |        |        |        |        |
|--------|--------|--------|--------|--------|--------|--------|--------|--------|--------|
| Ser420 | Leu500 | Gln396 | Ser841 | Lys435 | Ser126 | Lys429 | Lys436 | Gly505 | Gly505 |
| Lys429 | Glu502 | Ser399 | Pro842 | Lys436 | Asp127 | Tyr432 | Phe437 | Phe506 | Phe506 |
| Tyr432 | Lys503 | Asn415 | Gln844 | Ile438 | Ser128 | Tyr433 | Met439 | Pro508 | Pro507 |
| Tyr433 | Gly505 | Gly416 | Val847 | Met439 | Tyr129 | Lys435 | Glu440 | Leu509 | Glu511 |
| Lys436 | Phe506 | Trp417 | Ile875 | Glu440 | Asn131 | Lys436 | Lys443 | Asn512 | Asn512 |
| Met439 | Pro507 | Val419 | Asp876 | Lys443 | Val132 | Met439 | Leu447 | Gln513 | Glu736 |
| Glu440 | Pro508 | Ser420 | Asp877 | Phe496 | Arg134 | Glu440 | Pro507 | Pro514 | Pro737 |
| Lys443 | Leu509 | Thr422 | Gly878 | Leu500 | Asp135 | Lys443 | Leu509 | Glu736 | Ala738 |
| Leu447 | Pro510 | Thr423 | Leu879 | Gly505 | Thr136 | Leu447 | Pro510 | Pro737 | Pro740 |
| Asp448 | Glu511 | Lys424 | Ala881 | Phe506 | Leu139 | Phe506 | Glu511 | Pro740 | Phe741 |
| Arg468 | Asn512 | Arg425 | Glu882 | Leu509 | Tyr147 | Pro510 | Asn512 | Leu813 | Leu813 |
| Ile472 | Gln513 | Asp426 | Asp883 | Glu511 | Arg148 | Glu511 | Gln513 | Met833 | Asp835 |
| Glu511 | Pro514 | Asp427 | Asp884 | Asn512 | Phe149 | Asn512 | Ile812 | Thr834 | Ile836 |
| Asn512 | Glu736 | Ala428 | Gln885 | Gln513 | Ser150 | Pro690 | Glu817 | Asp835 | Thr837 |
| Gln513 | Pro737 | Lys429 | Leu886 | Pro514 | Ile151 | Tyr691 | Glu819 | Ile836 | Trp838 |
| Pro514 | Pro740 | Tyr432 | Arg887 | Leu515 | Ser152 | Thr692 | Asp820 | Thr837 | Leu839 |
| Thr810 | Phe741 | Tyr433 | Asp919 | Glu516 | Trp153 | Arg693 | Ile822 | Trp838 | Asn840 |
| Thr811 | Leu813 | Lys436 | Arg924 | Ala738 | Arg155 | Asn694 | Lys823 | Leu839 | Pro842 |
| Ile812 | Thr834 | Phe437 | Arg929 | Leu813 | Tyr172 | Leu730 | Gln831 | Asn840 | Gln844 |
| Glu819 | Asp835 | Met439 | Tyr930 | Asp815 | Tyr173 | Gln731 | Glu832 | Ser841 | Val847 |
| Asp820 | Ile836 | Lys443 | Ala931 | Glu817 | Leu176 | Asp733 | Met833 | Pro842 | Val848 |
| Pro821 | Thr837 | Leu447 | Lys938 | Lys818 | Thr190 | Trp734 | Thr834 | Gln844 | Pro849 |
| Ile822 | Trp838 | Asp448 | Ser940 | Glu819 | Leu191 | Ile735 | Asp835 | Val847 | Trp850 |
| Lys823 | Leu839 | Tyr478 |        | Met833 | Tyr192 | Val752 | Ile836 | Val848 | Lys854 |
| Gln831 | Asn840 | Ser492 |        | Thr834 | Trp194 | Leu753 | Thr837 | Pro849 | Gly878 |
| Glu832 | Ser841 | Leu495 |        | Asp835 | Asp195 | Asp756 | Trp838 | Trp850 | Leu879 |
| Met833 | Pro842 | Pro690 |        | Ile836 | Leu196 | Ile757 | Leu839 | Gly878 | Asp883 |
| Thr834 | Gln844 | Tyr691 |        | Thr837 | Pro197 | Leu760 | Asn840 | Leu879 | Asp884 |
| Asp835 | Val847 | Thr692 |        | Trp838 | Tyr219 | Ser807 | Gln844 | Ala881 | Gln885 |
| Ile836 | Val848 | Arg693 |        | Leu839 | Asp238 | Tyr809 | Ala846 | Glu882 | Leu886 |
| Thr837 | Pro849 | Met695 |        | Asn840 | Asn239 | Thr810 | Val847 | Asp883 | Tyr889 |
| Trp838 | Trp850 | Leu730 |        | Ser841 | Tyr241 | Thr811 | Val848 | Gln885 | Asn893 |
| Leu839 | Arg853 | Gln731 |        | Gln844 | Val242 | Ile812 | Pro849 | Leu886 | Asn896 |
| Asn840 | Lys854 | Ala732 |        | Val847 | Trp245 | Leu813 | Trp850 | Val888 | Glu897 |
| Ser841 | Asn857 | Asp733 |        | Val848 | Gly247 | Val814 | Tyr889 | Tyr889 |        |
| Pro842 | Gly878 | Ile735 |        | Pro849 | Thr250 | Asp815 | Asn893 | Gln892 |        |
| Gln844 | Leu879 | Ala738 |        | Trp850 | Arg252 | Glu817 | Glu897 | Asn893 |        |
| Val845 | Ala881 | Phe741 |        | Arg853 | Leu253 | Glu819 |        | Asn896 |        |
| Ala846 | Leu886 | Ser742 |        | Lys854 | Ser299 | Asp820 |        | Glu897 |        |
| Val847 | Tyr889 | Gln743 |        | Leu879 | Ser300 | Pro821 |        | Lys900 |        |
| Val848 | Asn893 | Lys744 |        | Ala881 | Trp302 | Ile822 |        | Phe953 |        |
| Pro849 | Asn896 | Asp745 |        | Glu882 | Ile303 | Lys823 |        |        |        |
| Trp850 | Glu897 | Val752 |        | Gln885 | Asn304 | Asn825 |        |        |        |
| Ile875 | Lys900 | Asp756 |        | Leu886 | Pro305 | Leu828 |        |        |        |

|        |        |        |        |        |        |
|--------|--------|--------|--------|--------|--------|
| Gly878 | Leu904 | Ile757 | Tyr889 | Arg306 | Val830 |
| Leu879 | Asp905 | Trp759 | Gln892 | Arg307 | Gln831 |
| Asp884 |        | Leu760 | Asn893 | Met308 | Glu832 |
| Gln885 |        | Ala761 | Asn896 | Ser319 | Met833 |
| Leu886 |        | Phe765 | Glu897 | Leu320 | Thr834 |
| Val888 |        | Leu804 | Lys900 | Val323 | Asp835 |
| Tyr889 |        | Leu806 | Phe953 | Leu324 | Ile836 |
| Tyr890 |        | Thr810 |        | Cys370 | Thr837 |
| Met891 |        | Thr811 |        | Phe371 | Trp838 |
| Gln892 |        | Ile812 |        | Gly372 | Leu839 |
| Asn893 |        | Leu813 |        | Pro373 | Asn840 |
| Tyr894 |        | Val814 |        | Thr374 | Ser841 |
| Asn896 |        | Asp815 |        | Leu375 | Pro842 |
| Glu897 |        | Ser816 |        | Ser376 | Ser843 |
| Lys900 |        | Glu817 |        | Phe377 | Gln844 |
| Ala939 |        | Lys818 |        | Gln378 | Val845 |
| Ser940 |        | Glu819 |        | Leu379 | Ala846 |
| Lys942 |        | Asp820 |        | Leu380 | Val847 |
| Tyr944 |        | Lys823 |        | Asp381 | Val848 |
| Lys946 |        | Tyr824 |        | Lys385 | Pro849 |
| Ile947 |        | Asn825 |        | Leu389 | Trp850 |
| Phe953 |        | Leu828 |        | Glu390 | Ile875 |
|        |        | Val830 |        | Ser391 | Asp876 |
|        |        | Gln831 |        | Pro392 | Asp877 |
|        |        | Glu832 |        | Asn393 | Gly878 |
|        |        | Met833 |        | Arg395 | Leu879 |
|        |        | Thr834 |        | Gln396 | Ala881 |
|        |        | Asp835 |        | Leu397 | Glu882 |
|        |        | Ile836 |        | Ser399 | Asp883 |
|        |        | Thr837 |        | Leu403 | Gln885 |
|        |        | Trp838 |        | Glu414 | Leu886 |
|        |        | Leu839 |        | Gly416 | Arg887 |
|        |        | Asn840 |        | Trp417 | Tyr889 |
|        |        | Ser841 |        | Phe418 |        |
|        |        | Pro842 |        | Val419 |        |
|        |        | Gln844 |        | Ser420 |        |
|        |        | Val845 |        | Lys429 |        |
|        |        | Ala846 |        | Met431 |        |
|        |        | Leu859 |        | Tyr432 |        |
|        |        | Ile875 |        | Tyr433 |        |
|        |        | Asp876 |        | Lys435 |        |
|        |        | Asp877 |        | Lys436 |        |
|        |        | Gly878 |        | Phe437 |        |
|        |        | Leu879 |        | Met439 |        |



|                 |        |
|-----------------|--------|
| Ala881          | Glu440 |
| Glu882          | Lys443 |
| Asp883          | Leu447 |
| Asp884          | Asp448 |
| Leu886          | Trp458 |
| Arg887          | Ser459 |
| Arg929          | Leu460 |
| <b>Pocket 2</b> | Met461 |
| Phe57           | Asp462 |
| Gln58           | Gly463 |
| Met431          | Phe464 |
| Tyr432          | Glu465 |
| Lys435          | Trp466 |
| Met439          | Arg468 |
| Phe496          | Tyr470 |
| Lys499          | Ser471 |
| Leu500          | Ile472 |
| Lys503          | Arg473 |
| Gly505          | Arg474 |
| Phe506          | Val479 |
| Pro507          | Asp480 |
| Leu509          | Phe481 |
| Glu511          | Leu488 |
| Asn512          | Phe496 |
| Glu736          | Lys499 |
| Pro737          | Leu500 |
| Ala738          | Lys503 |
| Pro740          | Gly505 |
| Phe741          | Phe506 |
| Leu813          | Pro507 |
| Asp835          | Leu509 |
| Trp838          | Glu511 |
| Leu839          | Asn512 |
| Val847          | Gln513 |
| Val848          | Pro514 |
| Pro849          | Glu736 |
| Trp850          | Pro737 |
| Lys854          | Pro740 |
| Tyr889          | Phe741 |
| Asn893          | Thr810 |
| Asn896          | Thr811 |
| Glu897          | Ile812 |
|                 | Leu813 |
|                 | Glu819 |

Asp820  
Lys823  
Gln831  
Glu832  
Met833  
Thr834  
Asp835  
Ile836  
Thr837  
Trp838  
Leu839  
Asn840  
Ser841  
Pro842  
Gln844  
Val845  
Ala846  
Val847  
Val848  
Pro849  
Trp850  
Arg853  
Lys854  
Asp876  
Asp877  
Gly878  
Leu879  
Ala881  
Asp884  
Gln885  
Leu886  
Arg887  
Tyr889  
Asn893  
Glu897

---

## S9. Correlation Between $\Delta G$ (Vina) and $\Delta G$ ( $K_{\text{DEEP}}$ )

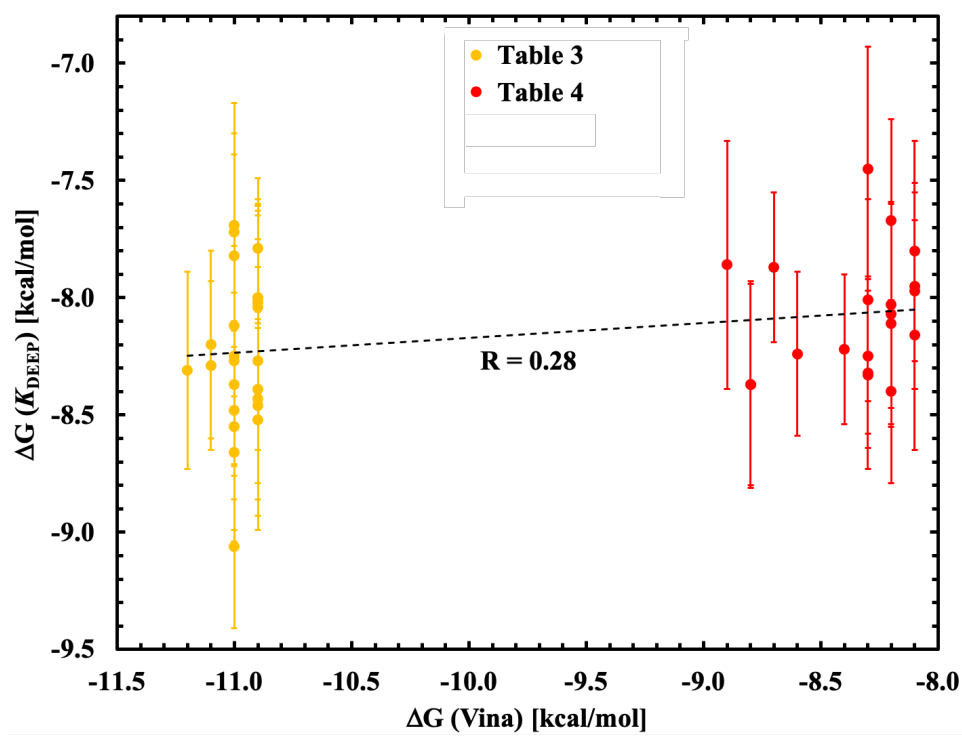

**Figure S5.** The linear dashed trendline between  $\Delta G$  (Vina) and  $\Delta G$  ( $K_{\text{DEEP}}$ ) in Tables 2 and 3 in the main text with Pearson's correlation coefficient ( $R$ ).<sup>11</sup> The capped bars show standard deviation of  $\Delta G$  ( $K_{\text{DEEP}}$ ).

## S10. Top 50 Compounds Ranked by $\overline{\Delta G (Vina)}$ Over All $\alpha$ -Klotho Structures in the Ensemble Docking

**Table S12.** The 50 compounds ranked by the lowest average estimated free energies of binding ( $\overline{\Delta G (Vina)}$ ) over all  $\alpha$ -Klotho structures in the ensemble docking. The compound selected for *in vitro* assays is in bold. The compounds in green also appear in Table 2 in the main text. The underscored compounds with the same ZINC ID have different protonation states in the database.<sup>12</sup>

| ZINC ID         | $\overline{\Delta G (Vina)}$<br>[kcal/mol] | ZINC ID         | $\overline{\Delta G (Vina)}$<br>[kcal/mol] |
|-----------------|--------------------------------------------|-----------------|--------------------------------------------|
| <b>12409120</b> | <b>-9.95</b>                               | 65236018        | -9.51                                      |
| 03617904        | -9.78                                      | 75536601        | -9.51                                      |
| 79095260        | -9.69                                      | 65248351        | -9.50                                      |
| 98150430        | -9.68                                      | 00620607        | -9.50                                      |
| <u>98150430</u> | -9.67                                      | 12515638        | -9.50                                      |
| 33020023        | -9.65                                      | <u>98150430</u> | -9.50                                      |
| 45202181        | -9.65                                      | 76357267        | -9.49                                      |
| 17322022        | -9.64                                      | 74377515        | -9.49                                      |
| 77974929        | -9.64                                      | 75536652        | -9.49                                      |
| 08976410        | -9.58                                      | 05052491        | -9.48                                      |
| 72164992        | -9.57                                      | 44329833        | -9.48                                      |
| 52491820        | -9.56                                      | 45202184        | -9.48                                      |
| 96132781        | -9.56                                      | 84594986        | -9.48                                      |
| <u>98150430</u> | -9.56                                      | 64890579        | -9.47                                      |
| 79095266        | -9.55                                      | 69775761        | -9.47                                      |
| 03908210        | -9.55                                      | 58230019        | -9.47                                      |
| 33020020        | -9.55                                      | <u>98150430</u> | -9.47                                      |
| 08997061        | -9.54                                      | 12559984        | -9.46                                      |
| 65248632        | -9.54                                      | <u>40375888</u> | -9.46                                      |
| 88338906        | -9.54                                      | 45799368        | -9.46                                      |
| 75536619        | -9.53                                      | 88339043        | -9.46                                      |
| 98150430        | -9.52                                      | 36652493        | -9.45                                      |
| <u>40375888</u> | -9.51                                      | 75536661        | -9.45                                      |
| <u>98150430</u> | -9.51                                      | 72170062        | -9.45                                      |
| 05313250        | -9.51                                      | <u>98150430</u> | -9.45                                      |

## S11. *In Silico* ZINC05326903: $\alpha$ -Klotho Interaction Analysis

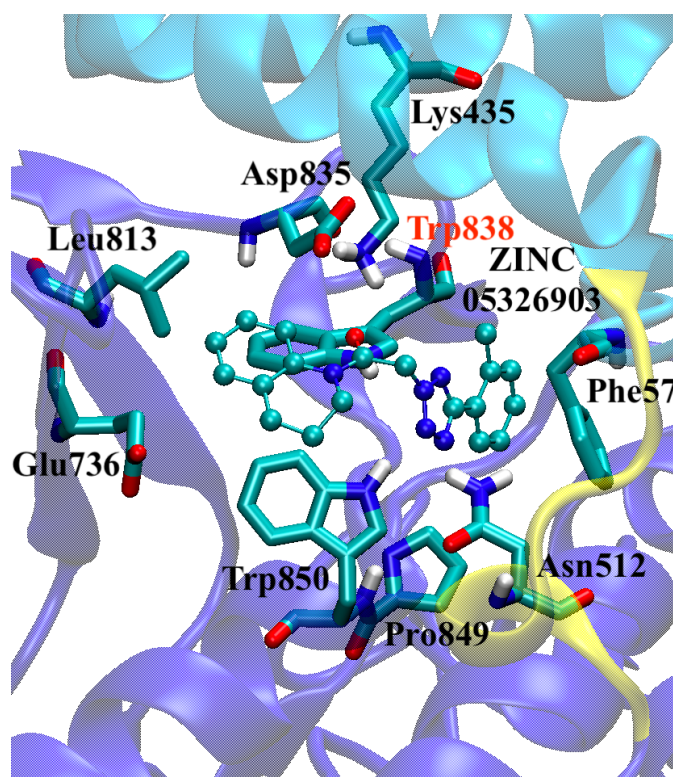

**Figure S6.** The binding pose of ZINC05326903 in the KL1-linker-KL2 (light blue-yellow-dark blue) region of  $\alpha$ -Klotho crystal structure<sup>7</sup> in the ensemble docking. Only residues whose protein-ligand non-hydrogen atomic contacts  $> 1$  are shown. The residue in red forms hydrogen bonds with the ligand.

## References

- (1) Bussi, G.; Donadio, D.; Parrinello, M. Canonical Sampling Through Velocity Rescaling. *J. Chem. Phys.* **2007**, *126*, 014101.
- (2) Berendsen, H. J. C.; Postma, J. P. M.; van Gunsteren, W. F.; DiNola, A.; Haak, J. R. Molecular Dynamics with Coupling to an External Bath. *J. Chem. Phys.* **1984**, *81*, 3684-3690.
- (3) Parrinello, M.; Rahman, A. Polymorphic Transitions in Single Crystals: A New Molecular Dynamics Method. *J. Appl. Phys.* **1981**, *52*, 7182-7190.
- (4) Fine, R. A.; Millero, F. J. Compressibility of Water as a Function of Temperature and Pressure. *J. Chem. Phys.* **1973**, *59*, 5529-5536.
- (5) Abraham, M. J.; Gready, J. E. Optimization of Parameters for Molecular Dynamics Simulation Using Smooth Particle-Mesh Ewald in GROMACS 4.5. *J. Comput. Chem.* **2011**, *32*, 2031-2040.
- (6) Hess, B. P-LINCS: A Parallel Linear Constraint Solver for Molecular Simulation. *J. Chem. Theory Comput.* **2008**, *4*, 116-122.
- (7) Chen, G.; Liu, Y.; Goetz, R.; Fu, L.; Jayaraman, S.; Hu, M.-C.; Moe, O. W.; Liang, G.; Li, X.; Mohammadi, M.  $\alpha$ -Klotho is a Non-Enzymatic Molecular Scaffold for FGF23 Hormone Signaling. *Nature* **2018**, *553*, 461-466.
- (8) Kozakov, D.; Grove, L. E.; Hall, D. R.; Bohnuud, T.; Mottarella, S. E.; Luo, L.; Xia, B.; Beglov, D.; Vajda, S. The FTMap Family of Web Servers for Determining and Characterizing Ligand-Binding Hot Spots of Proteins. *Nat. Protoc.* **2015**, *10*, 733-755.
- (9) Zhu, X.; Mitchell, J. C. KFC2: A Knowledge-Based Hot Spot Prediction Method Based on Interface Solvation, Atomic Density, and Plasticity Features. *Proteins* **2011**, *79*, 2671-2683.
- (10) Tian, W.; Chen, C.; Lei, X.; Zhao, J.; Liang, J. CASTp 3.0: Computed Atlas of Surface Topography of Proteins. *Nucleic Acids Res.* **2018**, *46*, W363-W367.
- (11) Jiménez, J.; Škalič, M.; Martínez-Rosell, G.; De Fabritiis, G.  $K_{DEEP}$ : Protein-Ligand Absolute Binding Affinity Prediction via 3D-Convolutional Neural Networks. *J. Chem. Inf. Model.* **2018**, *58*, 287-296.
- (12) Irwin, J. J.; Sterling, T.; Mysinger, M. M.; Bolstad, E. S.; Coleman, R. G. ZINC: A Free Tool to Discover Chemistry for Biology. *J. Chem. Inf. Model.* **2012**, *52*, 1757-1768.
